# Supplementary material for: Bone Deformities through the Prism of the International Classification of Functioning, Disability and Health in Ambulant Children with Cerebral Palsy: A Systematic Review
Source: MDPI journal article supplement (doi:10.3390/children11020257), 2024-02-16
Supplement: s1 [file s1]

| Title                                                                                                                                              | Author          | Year | SEMLS<br>or including<br>a soft tissue<br>procedure | Non-<br>ambulatory<br>CP | No available<br>outcome | Adult<br>population | Included | Funding |
|----------------------------------------------------------------------------------------------------------------------------------------------------|-----------------|------|-----------------------------------------------------|--------------------------|-------------------------|---------------------|----------|---------|
| Is Standing Function Improved After Orthopaedic Surgery in Children With Cerebral Palsy at GMFCS Levels III/IV?                                    | Lennon & al.    | 2022 | X                                                   |                          |                         |                     |          |         |
| Mid-Term Results of Distal Femoral Extension and Shortening Osteotomy in Treating Flexed Knee Gait in Children with Cerebral Palsy                 | Geisbüsch & al. | 2022 | X                                                   |                          |                         |                     |          |         |
| Genu Valgum After Distal Femur Extension Osteotomy in Children With Cerebral Palsy.                                                                | Liou & al.      | 2022 | X                                                   |                          |                         |                     |          |         |
| Prone vs Supine Positioning for Femoral Derotation Osteotomy: Kinematic and Physical Examination Outcomes Suggest Both Can Achieve Desired Results | Givon & al.     | 2022 | X                                                   |                          |                         |                     |          |         |
| What are the long-term outcomes of lateral column lengthening for pes planovalgus in cerebral palsy?                                               | Kruger & al.    | 2022 | X                                                   |                          |                         |                     |          |         |
| Femoral derotation osteotomy—Does intraoperative electromagnetic tracking reflect the dynamic outcome?                                             | Geisbüsch & al. | 2022 | X                                                   |                          |                         |                     |          |         |
| Proximal femoral derotation osteotomy in children with CP : long term outcome and the role of age at time of surgery                               | Vermuyten & al. | 2021 | X                                                   |                          |                         |                     |          |         |
| Long-term functional outcomes after an external femoral derotation osteotomy in individuals with cerebral palsy                                    | Boyer & al.     | 2021 |                                                     |                          |                         | X                   |          |         |
| Kinematics after unilateral femoral derotation osteotomy in children with diplegic cerebral palsy                                                  | Desailly & al.  | 2020 | X                                                   |                          |                         |                     |          |         |
| Double calcaneal osteotomy in treatment of flexible planovalgus foot deformity in ambulatory cerebral palsy. A case series study                   | Aly & al.       | 2019 | X                                                   |                          |                         |                     |          |         |
| Orthopaedic Surgery in Dystonic Cerebral Palsy                                                                                                     | Blumetti & al.  | 2019 | X                                                   |                          |                         |                     |          |         |
| The long-term outcome of pelvic asymmetry during gait in children with cerebral palsy following unilateral femoral derotation osteotomy            | Perotti & al.   | 2019 | X                                                   |                          |                         |                     |          |         |
| Supracondylar femoral rotation osteotomy affects frontal hip kinetics in children with bilateral cerebral palsy                                    | Thielen & al.   | 2019 | X                                                   |                          |                         |                     |          |         |
| Long-Term Outcomes of Distal Femoral Extension Osteotomy and Patellar Tendon Advancement in Individuals with Cerebral Palsy                        | Boyer & al.     | 2018 | X                                                   |                          |                         |                     |          |         |
| Preoperative hip rotation moments do not predict long-term development after femoral derotation osteotomy in children with cerebral palsy          | Braatz & al.    | 2018 | X                                                   |                          |                         |                     |          |         |
| The effect of hip reconstruction on gross motor function levels in children with cerebral palsy                                                    | Cobanoglu & al. | 2018 | X                                                   |                          |                         |                     |          |         |
| Changes in gait parameters after femoral derotational osteotomy in cerebral palsy patients with medial femoral torsion                             | Kim & al.       | 2018 | X                                                   |                          |                         |                     |          |         |
| The increase of anterior pelvic tilt after crouch gait treatment in patients with cerebral palsy                                                   | Morais & al.    | 2018 | X                                                   |                          |                         |                     |          |         |
| Proximal versus distal femoral derotation osteotomy in bilateral cerebral palsy                                                                    | Niklasch & al.  | 2018 | X                                                   |                          |                         |                     |          |         |
| Long-term development of overcorrection after femoral derotation osteotomy in children with cerebral palsy                                         | Niklasch & al.  | 2018 | X                                                   |                          |                         |                     |          |         |
| Surgical reconstruction of hip subluxation and dislocation in children with cerebral palsy                                                         | Oto & al.       | 2018 | X                                                   |                          |                         |                     |          |         |
| Long-term outcomes over 10 years after femoral derotation osteotomy in ambulatory children with cerebral palsy                                     | Sung & al.      | 2018 | X                                                   |                          |                         |                     |          |         |
| Long-term outcomes of external femoral derotation osteotomies in children with cerebral palsy                                                      | Öunpuu & al.    | 2017 | X                                                   |                          |                         |                     |          |         |
| Hallux valgus deformity correction without fusion in children with cerebral palsy                                                                  | Bayhan & al.    | 2017 | X                                                   |                          |                         |                     |          |         |
| Correlation of technical surgical goals to the GDI and investigation of post-operative GDI change in children with cerebral palsy                  | Bickley & al.   | 2017 | X                                                   |                          |                         |                     |          |         |

|                                                                                                                                                    |                 |      |   |   |   |   |   |                                                                        |
|----------------------------------------------------------------------------------------------------------------------------------------------------|-----------------|------|---|---|---|---|---|------------------------------------------------------------------------|
| Changes in hip abductor moment 3 or more years after femoral derotation osteotomy among individuals with cerebral palsy                            | Boyer & al.     | 2017 |   |   |   |   | X | Gait and Motion Outcomes<br>Fund of the Gillette Children's Foundation |
| Abnormality of standing posture improves in patients with bilateral spastic cerebral palsy following lower limb surgery                            | Buddhdev & al.  | 2017 | X |   |   |   |   |                                                                        |
| Persistence and Recurrence Following Femoral Derotational Osteotomy in Ambulatory Children With Cerebral Palsy                                     | Church & al.    | 2017 | X |   |   |   |   |                                                                        |
| Long-term Outcome of External Tibial Derotation Osteotomies in Children With Cerebral Palsy                                                        | Er & al.        | 2017 | X |   |   |   |   |                                                                        |
| Long-term Outcome of Internal Tibial Derotation Osteotomies in Children With Cerebral Palsy                                                        | Er & al.        | 2017 | X |   |   |   |   |                                                                        |
| Hip Reconstruction in Children With Unilateral Cerebral Palsy and Hip Dysplasia                                                                    | Abousamra & al. | 2016 | X |   |   |   |   |                                                                        |
| Satisfaction and pain levels after proximal femoral valgus osteotomy according to Schanz in patients with cerebral palsy and hip dislocation       | Harmsen & al.   | 2016 |   | X |   |   |   |                                                                        |
| Salvage procedures for the painful chronically dislocated hip in cerebral palsy                                                                    | Hwang & al.     | 2016 |   | X |   |   |   |                                                                        |
| The influence of timing of knee recurvatum on surgical outcome in cerebral palsy                                                                   | Klotz & al.     | 2016 | X |   |   |   |   |                                                                        |
| Outcomes of Orthopaedic Surgery With and Without an External Femoral Derotational Osteotomy in Children With Cerebral Palsy                        | McMulkin & al.  | 2016 | X |   |   |   |   |                                                                        |
| Correction of gait after derotation osteotomies in cerebral palsy: Are the effects predictable?                                                    | Böhm & al.      | 2015 | X |   |   |   |   |                                                                        |
| Asymmetric pelvic and hip rotation in children with bilateral cerebral palsy: uni- or bilateral femoral derotation osteotomy?                      | Niklasch & al.  | 2015 | X |   |   |   |   |                                                                        |
| Superior functional outcome after femoral derotation osteotomy according to gait analysis in cerebral palsy                                        | Niklasch & al.  | 2015 | X |   |   |   |   |                                                                        |
| Long-term results and outcome predictors in one-stage hip reconstruction in children with cerebral palsy                                           | Rutz & al.      | 2015 | X |   |   |   |   |                                                                        |
| Gait improvement surgery in ambulatory children with diplegic cerebral palsy                                                                       | Terjesen & al.  | 2015 | X |   |   |   |   |                                                                        |
| Long-term ambulatory change after lower extremity orthopaedic surgery in children with cerebral palsy: a retrospective review                      | Yu & al.        | 2015 | X |   |   |   |   |                                                                        |
| Crouch gait changes after planovalgus foot deformity correction in ambulatory children with cerebral palsy                                         | Kadhim & al.    | 2014 | X |   |   |   |   |                                                                        |
| Do changes in torsional magnetic resonance imaging reflect improvement in gait after femoral derotation osteotomy in patients with cerebral palsy? | Braatz & al.    | 2013 | X |   |   |   |   |                                                                        |
| Does the level of proximal femur rotation osteotomy influence the correction results in patients with cerebral palsy?                              | De Morais & al. | 2013 | X |   |   |   |   |                                                                        |
| Medial column stabilization improves the early result of calcaneal lengthening in children with cerebral palsy                                     | Huang & al.     | 2013 |   |   | X |   |   |                                                                        |
| Long-term outcome of planovalgus foot surgical correction in children with cerebral palsy                                                          | Kadhim & al.    | 2013 | X |   |   |   |   |                                                                        |
| Outcomes of correction of internal hip rotation in patients with spastic cerebral palsy using proximal femoral osteotomy                           | De Morais & al. | 2012 | X |   |   |   |   |                                                                        |
| Hip resurfacing with femoral osteotomy for painful subluxed or dislocated hips in patients with cerebral palsy                                     | Prosser & al.   | 2012 |   |   |   | X |   |                                                                        |
| The effects of femoral derotation osteotomy in cerebral palsy: a kinematic and kinetic study                                                       | Cimolin & al.   | 2011 |   |   |   |   | X | No specific funding                                                    |

|                                                                                                                                                 |                   |      |   |   |   |  |  |  |
|-------------------------------------------------------------------------------------------------------------------------------------------------|-------------------|------|---|---|---|--|--|--|
| Modified Goal Attainment Scale outcomes for ambulatory children: with and without orthopedic surgery                                            | Gordon & al.      | 2011 | X |   |   |  |  |  |
| Surgical management of hip subluxation and dislocation in children with cerebral palsy: isolated VDRO or combined surgery?                      | Huh & al.         | 2011 |   |   | X |  |  |  |
| Combined femoral and pelvic osteotomies versus femoral osteotomy alone in the treatment of hip dysplasia in children with cerebral palsy        | Al-Ghadir & al.   | 2009 |   | X |   |  |  |  |
| The effects of femoral derotation osteotomy in children with cerebral palsy: an evaluation using energy cost and functional mobility            | Amichai & al.     | 2009 | X |   |   |  |  |  |
| Calcaneal lengthening for planovalgus deformity in children with cerebral palsy                                                                 | Etti & al.        | 2009 | X |   |   |  |  |  |
| Effects of orthopedic intervention in adolescents and young adults with cerebral palsy                                                          | Westwell & al.    | 2009 | X |   |   |  |  |  |
| The outcome of surgical intervention for early deformity in young ambulant children with bilateral spastic cerebral palsy                       | Gough & al.       | 2008 | X |   |   |  |  |  |
| Results of treatment when orthopaedic surgeons follow gait-analysis recommendations in children with CP                                         | Lofterød & al.    | 2008 | X |   |   |  |  |  |
| Changes in dynamic foot pressure after surgical treatment of valgus deformity of the hindfoot in cerebral palsy                                 | Park & al.        | 2008 | X |   |   |  |  |  |
| Femoral derotation osteotomy in cerebral palsy: precise determination by tables                                                                 | Cobeljić & al.    | 2006 | X |   |   |  |  |  |
| Subtrochanteric valgus osteotomy for chronically dislocated, painful spastic hips                                                               | Hogan & al.       | 2006 | X |   |   |  |  |  |
| Leg lengthening as part of gait improvement surgery in cerebral palsy: an evaluation using gait analysis                                        | Saraph & al.      | 2006 | X |   |   |  |  |  |
| Results of tibial rotational osteotomy without concomitant fibular osteotomy in children with cerebral palsy                                    | Ryan & al.        | 2005 | X |   |   |  |  |  |
| Results of tibial rotational osteotomy without concomitant fibular osteotomy in children with cerebral palsy                                    | Ryan & al.        | 2005 | X |   |   |  |  |  |
| Calcaneal lengthening for the planovalgus foot deformity in children with cerebral palsy                                                        | Yoo & al.         | 2005 | X |   |   |  |  |  |
| Spastic hemiplegic cerebral palsy and the femoral derotation osteotomy: effect at the pelvis and hip in the transverse plane during gait        | Aminian & al.     | 2003 | X |   |   |  |  |  |
| Comparison of proximal and distal rotational femoral osteotomy in children with cerebral palsy                                                  | Kay & al.         | 2003 | X |   |   |  |  |  |
| Proximal femoral varus rotation osteotomy in cerebral palsy: a prospective gait study                                                           | Murray-Weir & al. | 2003 | X |   |   |  |  |  |
| Femoral derotation osteotomy in spastic diplegia. Proximal or distal?                                                                           | Pirpiris & al.    | 2003 | X |   |   |  |  |  |
| Rehabilitation after femoral osteotomy in cerebral palsy                                                                                        | Stasikelis & al.  | 2003 | X |   |   |  |  |  |
| Long-term effects of femoral derotation osteotomies: an evaluation using three-dimensional gait analysis                                        | Öunpuu & al.      | 2002 | X |   |   |  |  |  |
| Propulsive function during gait in diplegic children: evaluation after surgery for gait improvement                                             | Zwick & al.       | 2001 | X |   |   |  |  |  |
| The severely unstable hip in cerebral palsy. Treatment with open reduction, pelvic osteotomy, and femoral osteotomy with shortening             | Root & al.        | 1995 | X |   |   |  |  |  |
| Treatment of the chronically dislocated hip in adolescents with cerebral palsy with femoral head resection and subtrochanteric valgus osteotomy | McHale & al.      | 1990 | X |   |   |  |  |  |
| Surgery for hip dislocation in cerebral palsy                                                                                                   | Bos & al.         | 1987 | X |   |   |  |  |  |
