# Supplementary material for: Bone Deformities through the Prism of the International Classification of Functioning, Disability and Health in Ambulant Children with Cerebral Palsy: A Systematic Review
Source: MDPI journal article supplement (doi:10.3390/children11020257), 2024-02-16
Supplement: s1 [file s1]

| Title                                                                                                                                                      | Author                 | Year | No bone variable | No function outcome | No correlation | Method evaluation | Included | Funding             |
|------------------------------------------------------------------------------------------------------------------------------------------------------------|------------------------|------|------------------|---------------------|----------------|-------------------|----------|---------------------|
| Determinants of Hip and Femoral Deformities in Children With Spastic Cerebral Palsy.                                                                       | Cho & al.              | 2018 |                  |                     |                |                   | X        | None declared       |
| Correlation between physical examination and three-dimensional gait analysis in the assessment of rotational abnormalities in children with cerebral palsy | Teixeira & al.         | 2018 |                  |                     |                |                   | X        | None declared       |
| Femoral anteversion assessment: Comparison of physical examination, gait analysis, and EOS biplanar radiography.                                           | Westberry & al.        | 2018 |                  |                     |                |                   | X        | No specific funding |
| Correlation of the torsion values measured by rotational profile, kinematics, and CT study in CP patients.                                                 | Kim & al.              | 2017 |                  |                     |                |                   | X        | None declared       |
| Correlation between transverse plan kinematics and foot progression angle in children with spastic diplegia                                                | Presedo & al.          | 2017 |                  |                     |                |                   | X        | None declared       |
| Are clinical parameters sufficient to model gait patterns in patients with cerebral palsy using a multilinear approach?                                    | Bonnefoy-Mazure & al.  | 2016 | X                |                     |                |                   |          |                     |
| The effect of postural control and balance on femoral anteversion in children with spastic cerebral palsy.                                                 | Karabacak & al.        | 2016 |                  |                     |                |                   | X        | None declared       |
| Gait pattern differences between children with mild scoliosis and children with unilateral cerebral palsy.                                                 | Domagalska-Szopa & al. | 2014 | X                |                     |                |                   |          |                     |
| Discrimination of Abnormal Gait Parameters Due to Increased Femoral Anteversion from other Effects in Cerebral Palsy                                       | Akalan & al.           | 2013 |                  |                     | X              |                   |          |                     |
| Sit-to-stand movement in children with hemiplegic cerebral palsy: relationship with knee extensor torque and social participation.                         | Dos Santos & al.       | 2013 | X                |                     |                |                   |          |                     |

| Title | Author | Year | No bone variable | No function outcome | No correlation | Method evaluation | Included | Funding |
|-------|--------|------|------------------|---------------------|----------------|-------------------|----------|---------|
|-------|--------|------|------------------|---------------------|----------------|-------------------|----------|---------|

| Title                                                                                                                                                         | Author           | Year | No bone variable | No function outcome | No correlation | Method evaluation | Included | Funding                                                                                                     |
|---------------------------------------------------------------------------------------------------------------------------------------------------------------|------------------|------|------------------|---------------------|----------------|-------------------|----------|-------------------------------------------------------------------------------------------------------------|
| Femoral anteversion and tibial torsion only explain 25% of variance in regression analysis of foot progression angle in children with diplegic cerebral palsy | Lee & al.        | 2013 |                  |                     |                |                   | X        | Research funding (grant no. 02-2011-045) from Seoul National University Bundang Hospital, Republic of Korea |
| Are clinical measurements linked to the gait deviation index in cerebral palsy patients?                                                                      | Sagawa & al.     | 2013 | X                |                     |                |                   |          |                                                                                                             |
| Morphometric analysis of the femur in cerebral palsy: 3-dimensional CT study.                                                                                 | Gose & al.       | 2010 |                  | X                   |                |                   |          |                                                                                                             |
| Correlation Between Lower Limb Bone Morphology and Gait Characteristics in Children With Spastic Diplegic Cerebral Palsy.                                     | Carriero & al.   | 2009 |                  |                     | X              |                   |          |                                                                                                             |
| Relationship between kinematic knee deviations and femoral anteversion in children with cerebral palsy                                                        | Piccinini & al.  | 2009 |                  |                     | X              |                   |          |                                                                                                             |
| Do dynamic and static clinical measurements correlate with gait analysis parameters in children with cerebral palsy?                                          | Desloovere & al. | 2006 |                  |                     |                |                   | X        | None declared                                                                                               |
| The mid-point of passive hip rotation range is an indicator of hip rotation in gait in cerebral palsy.                                                        | Kerr & al.       | 2003 |                  |                     |                |                   | X        | None declared                                                                                               |
| Effects of lower limb torsion on ankle kinematic data during gait analysis                                                                                    | Song & al.       | 2001 |                  |                     |                | X                 |          |                                                                                                             |
| Evaluation of rotational gait abnormality in the patients cerebral palsy.                                                                                     | Aktas & al.      | 2000 |                  |                     |                |                   | X        | None declared                                                                                               |
| Femoral anteversion and neck-shaft angles in hip instability in cerebral palsy.                                                                               | Laplaza & al.    | 1994 |                  | X                   |                |                   |          |                                                                                                             |
| Femoral torsion and neck shaft angles in cerebral palsy.                                                                                                      | Laplaza & al.    | 1993 |                  |                     | X              |                   |          |                                                                                                             |
