# Supplementary material for: Bone Deformities through the Prism of the International Classification of Functioning, Disability and Health in Ambulant Children with Cerebral Palsy: A Systematic Review
Source: MDPI journal article supplement (doi:10.3390/children11020257), 2024-02-16
Supplement: s1 [file s1]

**Supplementary Material 2: Quality evaluation of the studies included using the checklist for case series (CSS) for question 1 (Table A1) and by the Quebec quality assessment grid for question 2 (Table B1). Additional questions added for the review are shown in tables A2 and B2.**

| <b>A1</b>                                                                                                         | <b>Teixeira et al. 2018</b> | <b>Westberry et al. 2018</b> | <b>Cho et al. 2018</b> | <b>Presedo et al. 2017</b> | <b>Kim et al. 2017</b> | <b>Karabacak et al. 2016</b> | <b>Lee et al. 2013</b> | <b>Desloovere et al. 2006</b> | <b>Kerr et al. 2003</b> | <b>Aktas et al. 2000</b> |
|-------------------------------------------------------------------------------------------------------------------|-----------------------------|------------------------------|------------------------|----------------------------|------------------------|------------------------------|------------------------|-------------------------------|-------------------------|--------------------------|
| <b>Checklist for Case Series</b>                                                                                  |                             |                              |                        |                            |                        |                              |                        |                               |                         |                          |
| 1. Were there clear criteria for inclusion in the case series?                                                    | Yes                         | Unclear                      | Unclear                | Yes                        | Unclear                | Yes                          | Yes                    | Yes                           | Unclear                 | No                       |
| 2. Was the condition* measured in a standard, reliable way for all participants included in the case series?      | No                          | No                           | No                     | No                         | No                     | No                           | No                     | No                            | No                      | No                       |
| 3. Were valid methods used for identification of the condition* for all participants included in the case series? | No                          | No                           | No                     | No                         | No                     | No                           | No                     | No                            | No                      | No                       |
| 4. Did the case series have consecutive inclusion of participants?                                                | Yes                         | Yes                          | Yes                    | Unclear                    | Unclear                | Unclear                      | Yes                    | No                            | Unclear                 | Unclear                  |
| 5. Did the case series have complete inclusion of participants?                                                   | No                          | Yes                          | Yes                    | Unclear                    | Unclear                | Yes                          | Yes                    | No                            | Unclear                 | Unclear                  |
| 6. Was there clear reporting of the demographics of the participants in the study?                                | Unclear                     | Yes                          | Unclear                | Unclear                    | Unclear                | Yes                          | Unclear                | Unclear                       | Unclear                 | Unclear                  |
| 7. Was there clear reporting of clinical information of the participants?                                         | Yes                         | Unclear                      | Yes                    | Yes                        | Unclear                | Yes                          | Yes                    | Yes                           | No                      | No                       |
| 8. ** Was the measure of bone morphology clearly reported?                                                        | Yes                         | Yes                          | Yes                    | Yes                        | Yes                    | Yes                          | Yes                    | Yes                           | Yes                     | Yes                      |
| 9. Was there clear reporting of the presenting site(s)/clinic(s) demographic information?                         | Yes                         | Yes                          | Unclear                | Unclear                    | No                     | Yes                          | Yes                    | Yes                           | Yes                     | Unclear                  |
| 10. Was statistical analysis appropriate?                                                                         | Yes                         | Unclear                      | Unclear                | Yes                        | No                     | Unclear                      | Unclear                | Unclear                       | Unclear                 | No                       |

\*Condition = Cerebral palsy

\*\*Original question: Were the outcomes or follow up results of cases clearly reported?

| <b>A2</b><br><b>Additional items for Research question 1</b>                                | Teixeira<br>et al.<br>2018 | Westberry<br>et al. 2018 | Cho et<br>al.<br>2018 | Presedo<br>et al.<br>2017 | Kim et<br>al.<br>2017 | Karabicak<br>et al.<br>2016 | Lee et<br>al.<br>2013 | Desloovere<br>et al. 2006 | Kerr et<br>al.<br>2003 | Aktas et<br>al.<br>2000 |
|---------------------------------------------------------------------------------------------|----------------------------|--------------------------|-----------------------|---------------------------|-----------------------|-----------------------------|-----------------------|---------------------------|------------------------|-------------------------|
| i. Was the validity of measure of bone morphology clearly reported?                         | No                         | Yes                      | No                    | Unclear                   | Unclear               | Unclear                     | Unclear               | Unclear                   | Unclear                | Yes                     |
| ii. Was the measure of body functions/activity/participation clearly reported?              | Yes                        | Yes                      | Yes                   | Yes                       | Yes                   | Yes                         | Yes                   | Yes                       | Yes                    | Yes                     |
| iii. Was the validity of measure of body functions/activity/participation clearly reported? | Unclear                    | Yes                      | Unclear               | Yes                       | No                    | Unclear                     | Yes                   | Unclear                   | Unclear                | No                      |
| iv. Was the description of correlation analysis criteria reported?                          | Yes                        | Yes                      | No                    | No                        | No                    | Yes                         | No                    | Yes                       | No                     | No                      |



|     |                                                   |        |              |    |         |    |                |    |         |    |
|-----|---------------------------------------------------|--------|--------------|----|---------|----|----------------|----|---------|----|
| B   | Quality assessment grid for observational studies | Author | Boyer et al. |    |         |    | Cimolin et al. |    |         |    |
|     |                                                   | Year   | 2017         |    |         |    | 2011           |    |         |    |
|     |                                                   |        | Yes          | No | Unclear | NA | Yes            | No | Unclear | NA |
| AIM |                                                   |        |              |    |         |    |                |    |         |    |
|     |                                                   |        |              |    |         |    |                |    |         |    |

|         |                                                                                                                                                                                               |   |   |   |   |   |   |   |   |
|---------|-----------------------------------------------------------------------------------------------------------------------------------------------------------------------------------------------|---|---|---|---|---|---|---|---|
| O1      | Is the aim of the article stated by specifying, at a minimum, the intervention, the population and the main outcome?                                                                          | X |   |   |   | X |   |   |   |
| METHOD  |                                                                                                                                                                                               |   |   |   |   |   |   |   |   |
| M1      | Is the context of the study (location, recruitment period) clearly described?                                                                                                                 |   | X |   |   |   | X |   |   |
| M2      | Are the inclusion / exclusion criteria for study participants specified?                                                                                                                      | X |   |   |   | X |   |   |   |
| M3      | Is the method of recruiting participants adequate?                                                                                                                                            | X |   |   |   |   |   | X |   |
| M4      | Is the targeted intervention sufficiently described (dosage, mode of administration, provider, other parameters)?                                                                             |   | X |   |   | X |   |   |   |
| M5      | Is the comparator sufficiently described (dosage, mode of administration, provider, other parameters)?                                                                                        |   | X |   |   |   | X |   |   |
| M6      | Are the outcomes well defined?                                                                                                                                                                | X |   |   |   | X |   |   |   |
| M7      | Are all the measurement tools used standardized, valid and reliable?                                                                                                                          |   |   | X |   | X |   |   |   |
| M8      | Was the exposure or procedure without the knowledge of those evaluating the results?                                                                                                          |   |   |   | X |   |   |   | X |
| M9      | Are the planned statistical analyses appropriate?                                                                                                                                             | X |   |   |   | X |   |   |   |
| M10     | Are precision measures such as confidence intervals, standard deviations or interquartile ranges planned?                                                                                     |   |   | X |   |   |   | X |   |
| M11     | Is an estimate of the number of participants needed to ensure adequate power made?                                                                                                            |   | X |   |   |   | X |   |   |
| RESULTS |                                                                                                                                                                                               |   |   |   |   |   |   |   |   |
| R1      | Is the study population representative of the target population?                                                                                                                              | X |   |   |   |   | X |   |   |
| R2      | Is the number of participants analyzed sufficient to ensure the statistical power of the study for the assessment of the primary indicator?                                                   |   |   | X |   |   | X |   |   |
| R3      | Is the level of participation sufficient?                                                                                                                                                     |   |   |   | X |   |   |   | X |
| R4      | Is the number of participants reported for each stage of the study (number at enrolment, eligibility, included in the study, having completed follow-up and included in the final analysis) ? | X |   |   |   | X |   |   |   |

|                                          |                                                                             |              |   |   |   |              |   |   |   |
|------------------------------------------|-----------------------------------------------------------------------------|--------------|---|---|---|--------------|---|---|---|
| R5                                       | Is the percentage of lost subjects less than 20%?                           |              |   |   | X |              |   |   | X |
| R6                                       | Are the reasons for lost to follow up identified?                           |              | X |   |   |              |   |   | X |
| R7                                       | Are the lost to follow up subjects and participants compared?               |              |   |   | X |              |   |   | X |
| R8                                       | Are the characteristics of the study population sufficiently described?     |              |   | X |   |              |   | X |   |
| R9                                       | Do the results presented take into account potentially confounding factors? |              | X |   |   |              |   | X |   |
| R10                                      | Is adherence to treatment* (compliance) assessed?                           |              | X |   |   |              | X |   |   |
| R11                                      | Are the analyses performed as planned?                                      |              |   | X |   |              |   | X |   |
| R12                                      | Is the duration of follow-up adequate to observe the result?                | X            |   |   |   |              |   | X |   |
| <b>DISCUSSION</b>                        |                                                                             |              |   |   |   |              |   |   |   |
| D1                                       | Do the findings of the study address the main objectives?                   | X            |   |   |   | X            |   |   |   |
| D2                                       | Do the authors identify the limits of the study?                            | X            |   |   |   | X            |   |   |   |
| D3                                       | Is the consistency of the results with those of other studies discussed?    | X            |   |   |   | X            |   |   |   |
| D4                                       | Are the study findings consistent with the key findings?                    | X            |   |   |   | X            |   |   |   |
| <b>OTHER CONSIDERATIONS</b>              |                                                                             |              |   |   |   |              |   |   |   |
| A1                                       | Is the funding for the study reported?                                      |              |   | X |   | X            |   |   |   |
| A2                                       | Are conflicts of interest addressed?                                        | X            |   |   |   | X            |   |   |   |
| A3                                       | Is there a potential for conflicts of interest?                             |              |   |   | X |              |   |   | X |
| The general quality of the study is:     |                                                                             | Satisfactory |   |   |   | Satisfactory |   |   |   |
| *post-operative treatment was considered |                                                                             |              |   |   |   |              |   |   |   |

| <b>B2</b>                                       |                                                                           | <b>Author</b> | Boyer et al. |    |         |    | Cimolin et al. |    |         |    |
|-------------------------------------------------|---------------------------------------------------------------------------|---------------|--------------|----|---------|----|----------------|----|---------|----|
|                                                 |                                                                           | <b>Year</b>   | 2017         |    |         |    | 2011           |    |         |    |
| <b>Additional items for Research question 2</b> |                                                                           |               | Yes          | No | Unclear | NA | Yes            | No | Unclear | NA |
| i.                                              | Is the postoperative management protocol described?                       |               |              | X  |         |    | X              |    |         |    |
| ii.                                             | Are the characteristics of the control population sufficiently described? |               |              | X  |         |    |                |    | X       |    |
