# Supplementary material for: Bone Deformities through the Prism of the International Classification of Functioning, Disability and Health in Ambulant Children with Cerebral Palsy: A Systematic Review
Source: MDPI journal article supplement (doi:10.3390/children11020257), 2024-02-16
Supplement: s1 [file s1]

## Supplementary Material 1: Search strings used in the systematic review for each question

|            | Population     | Bone morphology                                                                                                                                                                                                                                                                                                                                                                                                                                                                                                                                                                                                                           | Surgery | Body functions                                                                                                                                                                                                                                                                                                                                                                                                                                                                                                                                                              | Activity                                                                                                                                                                                                                                                                                                                                                                                                                                                                             | Participation                                                                                                                                                                                            | Study type                                                                                                                |
|------------|----------------|-------------------------------------------------------------------------------------------------------------------------------------------------------------------------------------------------------------------------------------------------------------------------------------------------------------------------------------------------------------------------------------------------------------------------------------------------------------------------------------------------------------------------------------------------------------------------------------------------------------------------------------------|---------|-----------------------------------------------------------------------------------------------------------------------------------------------------------------------------------------------------------------------------------------------------------------------------------------------------------------------------------------------------------------------------------------------------------------------------------------------------------------------------------------------------------------------------------------------------------------------------|--------------------------------------------------------------------------------------------------------------------------------------------------------------------------------------------------------------------------------------------------------------------------------------------------------------------------------------------------------------------------------------------------------------------------------------------------------------------------------------|----------------------------------------------------------------------------------------------------------------------------------------------------------------------------------------------------------|---------------------------------------------------------------------------------------------------------------------------|
| Question 1 | Cerebral Pals* | Bone* OR deform* OR<br>morpholog* OR shape*<br>OR femur OR femor*<br>OR tibia* OR foot<br>OR torsion* OR<br>rotation* OR<br>anteversion OR tilt OR<br>obliquity<br>OR "bicondylar angle"<br>OR "neck-shaft angle"<br>"lower limb" OR "Bone<br>and Bones"[Mesh] OR<br>"Bone<br>Anteversion"[Mesh] OR<br>"Bone<br>Malalignment"[Mesh]<br>OR "Bone<br>Development"[Mesh]<br>OR "Pelvic<br>Bones"[Mesh]<br>OR "Leg Bones"[Mesh]<br>OR "Hip"[Mesh] OR "Hip<br>Joint"[Mesh]<br>OR "Femur"[Mesh] OR<br>"Femur Neck"[Mesh]<br>OR "Femur<br>Head"[Mesh]<br>OR "Tibia"[Mesh]<br>OR "Torsion<br>Abnormality"[Mesh]<br>OR "Foot<br>Deformities"[Mesh] |         | gait<br>OR "motor capacity"<br>OR "motor capability"<br>OR "range of motion"<br>OR "ROM" OR<br>strength OR spasticity<br>OR "motor control"<br>OR "selectivity motor<br>control"<br>OR speed<br>OR balance<br>OR "postural control"<br>OR "TUG" OR "Time*<br>Up and Go"<br>OR "walk* test*"<br>OR "Gait Disorders,<br>Neurologic"[Mesh]<br>OR "Mobility<br>Limitation"[Mesh]<br>OR "Walk<br>Test"[Mesh]<br>OR "Postural<br>Balance"[Mesh]<br>OR "Walking<br>Speed"[Mesh]<br>OR "Range of Motion,<br>Articular"[Mesh]<br>OR "Biomechanical<br>Phenomena"[Mesh]<br>OR "Muscle | activit* OR<br>walk* OR<br>ambulat*<br>OR stand* OR<br>run* OR<br>jump*OR "daily<br>life" OR<br>"functional<br>disabilit*"<br>OR mobility OR<br>performance OR<br>OR Walk* OR<br>Gait OR<br>Ambulat*<br>OR Gait speed OR<br>Walk* perimeter<br>OR Stand OR Run<br>OR Jump<br>OR "6-Minute<br>walk test" OR<br>"Endurance<br>shuttle walk test"<br>OR "ESWT" OR<br>"Incremental<br>shuttle walk test"<br>OR "ISWT" OR<br>Walking[Mesh]<br>OR "Activities of<br>Daily<br>Living"[Mesh] | Participation OR<br>school<br>OR leisure*<br>OR game*<br>OR Hobb*<br>* OR Play*<br>OR Sport* OR<br>"Social<br>Participation"[Mesh]<br>OR "Leisure<br>Activities"[Mesh] OR<br>"Quality of life"<br>[MeSH] | correlation* OR<br>association*<br>OR predict* OR<br>regression* OR<br>relationship*<br>OR<br>"multivariable<br>analysis" |

|               |                |                                                                                                                                                                                                                                                                                                                                                                                                                                                                                                                                                                                                                                              |                                                                                                                                                                                                                                                                                                                                                                                                                                                                                                         |                                                                                                                                                                                                                                                                                                                                                                                                                                                                                                                                                                                      |                                                                                                                                                                                                                                                                                                                                                                                                                                                                                            |                                                                                                                                                                                                          |                                                                                                                              |
|---------------|----------------|----------------------------------------------------------------------------------------------------------------------------------------------------------------------------------------------------------------------------------------------------------------------------------------------------------------------------------------------------------------------------------------------------------------------------------------------------------------------------------------------------------------------------------------------------------------------------------------------------------------------------------------------|---------------------------------------------------------------------------------------------------------------------------------------------------------------------------------------------------------------------------------------------------------------------------------------------------------------------------------------------------------------------------------------------------------------------------------------------------------------------------------------------------------|--------------------------------------------------------------------------------------------------------------------------------------------------------------------------------------------------------------------------------------------------------------------------------------------------------------------------------------------------------------------------------------------------------------------------------------------------------------------------------------------------------------------------------------------------------------------------------------|--------------------------------------------------------------------------------------------------------------------------------------------------------------------------------------------------------------------------------------------------------------------------------------------------------------------------------------------------------------------------------------------------------------------------------------------------------------------------------------------|----------------------------------------------------------------------------------------------------------------------------------------------------------------------------------------------------------|------------------------------------------------------------------------------------------------------------------------------|
| Question<br>2 | Cerebral Pals* | Bone* OR deform* OR<br>morpholog* OR<br>shape*<br>OR femur OR femor*<br>OR tibia* OR foot<br>OR torsion* OR<br>rotation* OR<br>anteversion OR tilt OR<br>obliquity<br>OR "bicondylar angle"<br>OR "neck-shaft angle"<br>"lower limb" OR "Bone<br>and Bones"[Mesh] OR<br>"Bone<br>Anteversion"[Mesh] OR<br>"Bone<br>Malalignment"[Mesh]<br>OR "Bone<br>Development"[Mesh]<br>OR "Pelvic<br>Bones"[Mesh]<br>OR "Leg Bones"[Mesh]<br>OR "Hip"[Mesh] OR<br>"Hip Joint"[Mesh]<br>OR "Femur"[Mesh] OR<br>"Femur Neck"[Mesh]<br>OR "Femur<br>Head"[Mesh]<br>OR "Tibia"[Mesh]<br>OR "Torsion<br>Abnormality"[Mesh]<br>OR "Foot<br>Deformities"[Mesh] | Osseous<br>reconstruction<br>intervention OR<br>Bon* surgery OR<br>Osteotom* OR<br>Operative<br>treatment OR<br>Orthopaedic<br>surgery<br>OR Extension*<br>osteotomy<br>OR Derotation*<br>osteotomy<br>OR Rotation*<br>osteotomy<br>OR Lengthen*<br>osteotomy<br>OR Varisation<br>osteotomy<br>OR Naviclectomy<br>OR "Surgery"<br>[MeSH]<br>OR "Orthopedics"<br>[MeSH]<br>OR "Osteotomy"<br>[MeSH]<br>OR "Arthrodesis"<br>[MeSH]<br>OR "Bone<br>lengthening"<br>[MeSH]<br>OR "Arthroplasty"<br>[MeSH] ? | gait<br>OR "motor capacity"<br>OR "motor<br>capability"<br>OR "range of<br>motion" OR "ROM"<br>OR strength OR<br>spasticity OR "motor<br>control" OR<br>"selectivity motor<br>control"<br>OR speed<br>OR balance<br>OR "postural control"<br>OR "TUG" OR "Time*<br>Up and Go"<br>OR "walk* test*"<br>OR "Gait Disorders,<br>Neurologic"[Mesh]<br>OR "Mobility<br>Limitation"[Mesh]<br>OR "Walk<br>Test"[Mesh]<br>OR "Postural<br>Balance"[Mesh]<br>OR "Walking<br>Speed"[Mesh]<br>OR "Range of<br>Motion,<br>Articular"[Mesh]<br>OR "Biomechanical<br>Phenomena"[Mesh]<br>OR "Muscle | activit* OR<br>walk* OR<br>ambulat*<br>OR stand* OR<br>run* OR<br>jump*OR "daily<br>life" OR<br>"functional<br>disabilit*"<br>OR mobility OR<br>performance OR<br>OR Walk* OR<br>Gait OR<br>Ambulat*<br>OR Gait speed<br>OR Walk*<br>perimeter<br>OR Stand OR<br>Run OR Jump<br>OR "6-Minute<br>walk test" OR<br>"Endurance<br>shuttle walk<br>test" OR "ESWT"<br>OR "Incremental<br>shuttle walk<br>test" OR "ISWT"<br>OR<br>Walking[Mesh]<br>OR "Activities of<br>Daily<br>Living"[Mesh] | Participation OR<br>school<br>OR leisure*<br>OR game*<br>OR Hobb*<br>* OR Play*<br>OR Sport* OR<br>"Social<br>Participation"[Mesh]<br>OR "Leisure<br>Activities"[Mesh] OR<br>"Quality of life"<br>[MeSH] | correlation*<br>OR<br>associat*<br>OR predict*<br>OR regression*<br>OR<br>relationship*<br>OR<br>"multivariable<br>analysis" |
|---------------|----------------|----------------------------------------------------------------------------------------------------------------------------------------------------------------------------------------------------------------------------------------------------------------------------------------------------------------------------------------------------------------------------------------------------------------------------------------------------------------------------------------------------------------------------------------------------------------------------------------------------------------------------------------------|---------------------------------------------------------------------------------------------------------------------------------------------------------------------------------------------------------------------------------------------------------------------------------------------------------------------------------------------------------------------------------------------------------------------------------------------------------------------------------------------------------|--------------------------------------------------------------------------------------------------------------------------------------------------------------------------------------------------------------------------------------------------------------------------------------------------------------------------------------------------------------------------------------------------------------------------------------------------------------------------------------------------------------------------------------------------------------------------------------|--------------------------------------------------------------------------------------------------------------------------------------------------------------------------------------------------------------------------------------------------------------------------------------------------------------------------------------------------------------------------------------------------------------------------------------------------------------------------------------------|----------------------------------------------------------------------------------------------------------------------------------------------------------------------------------------------------------|------------------------------------------------------------------------------------------------------------------------------|
