# Supplementary material for: Bone Deformities through the Prism of the International Classification of Functioning, Disability and Health in Ambulant Children with Cerebral Palsy: A Systematic Review
Source: Children (Basel). 2024 Feb 16;11(2):257. doi: 10.3390/children11020257 (PMC10888000; doi:10.3390/children11020257)
Supplement: Supplementary file 1 [file children-11-00257-s001.zip]

Archive with 4 entries (4 files):
- Children_SM3.pdf
- Children_SM4.pdf
- Children_SM_1.pdf
- Children_SM_2.pdf
